# Supplementary material for: Partially hydrolyzed guar gum is associated : with improvement in gut health, sleep, and motivation among healthy subjects
Source: PubMed Central journal article supplement — J Clin Biochem Nutr. 2023 Jan 13;72(2):189–97. doi: 10.3164/jcbn.22-75 (PMC10017317; doi:10.3164/jcbn.22-75), 2023-01-13
Supplement: jcbn22-75_1.pdf [file jcbn22-75_1.pdf]

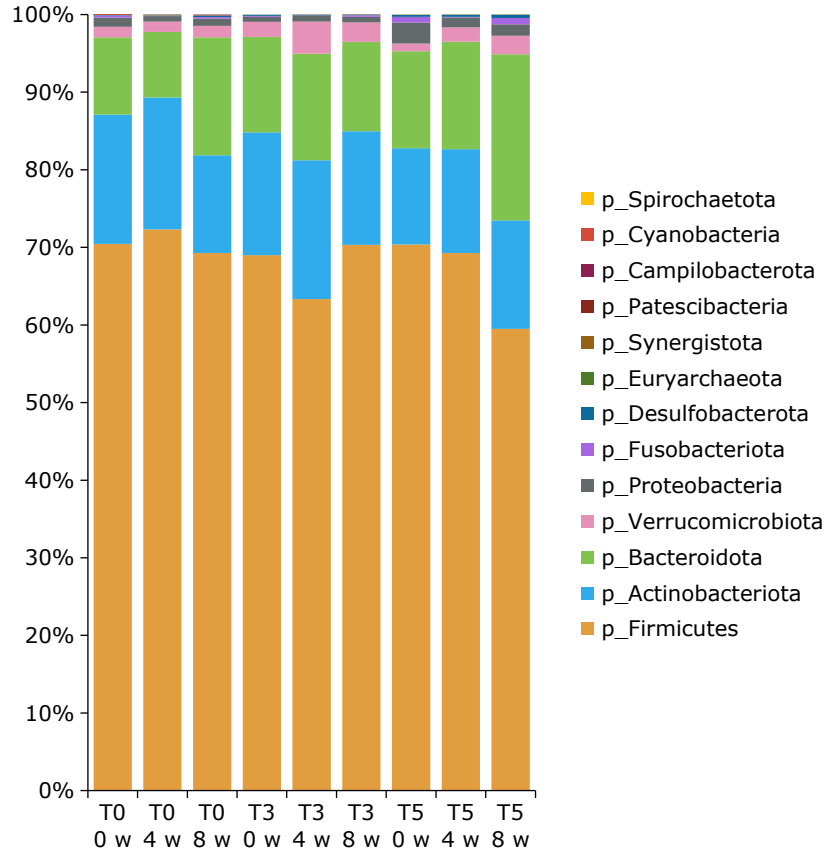

**Supplemental Fig. 1.** The relative abundance of intestinal microbiota at the phyla level. T0, Placebo; T3, PHGG 3 g/day; T5, PHGG 5 g/day. 0 w, 0 week; 4 w, 4 week; 8 w, 8 week.
