# Supplementary material for: Partially hydrolyzed guar gum is associated : with improvement in gut health, sleep, and motivation among healthy subjects
Source: PubMed Central journal article supplement — J Clin Biochem Nutr. 2023 Jan 13;72(2):189–97. doi: 10.3164/jcbn.22-75 (PMC10017317; doi:10.3164/jcbn.22-75), 2023-01-13
Supplement: jcbn22-75_3.pdf [file jcbn22-75_3.pdf]

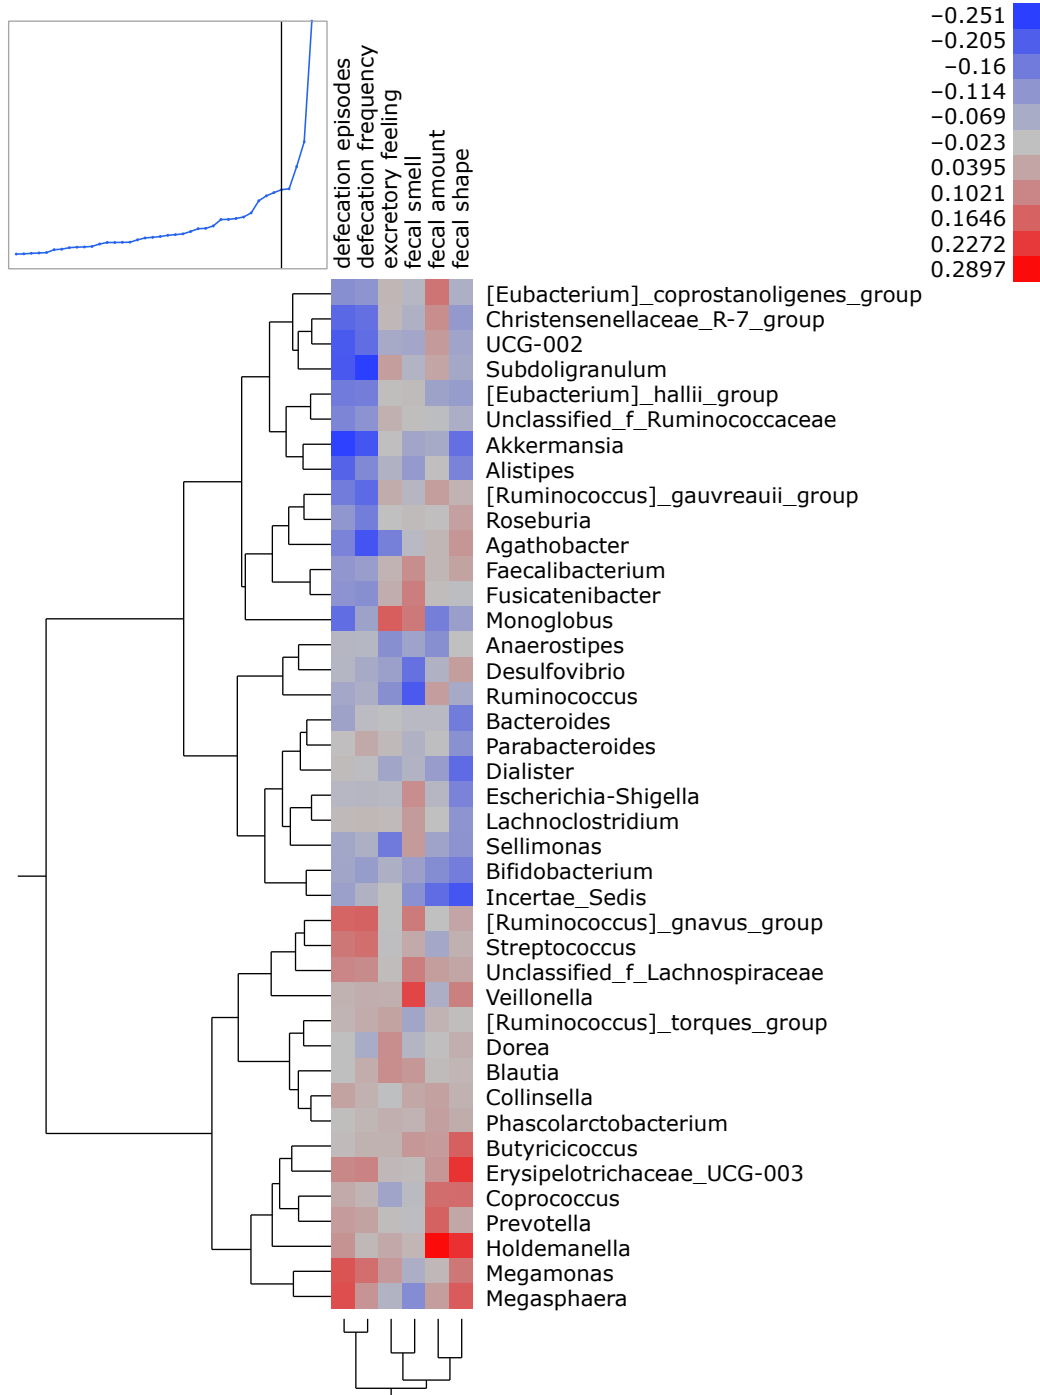

**Supplemental Fig. 3.** The correlation analysis between intestinal microbiome and defecation characteristics. Spearman's rank correlation analysis of intestinal microbiome ratios (genus level) and scores of defecation characteristics was performed. Cells were colored according to their values of the Spearman's rank correlation coefficient ( $\rho$ ).
