# Supplementary material for: Partially hydrolyzed guar gum is associated : with improvement in gut health, sleep, and motivation among healthy subjects
Source: PubMed Central journal article supplement — J Clin Biochem Nutr. 2023 Jan 13;72(2):189–97. doi: 10.3164/jcbn.22-75 (PMC10017317; doi:10.3164/jcbn.22-75), 2023-01-13
Supplement: jcbn22-75_4.pdf [file jcbn22-75_4.pdf]

**Supplemental Table 1.** The changes from the baseline of the relative abundance of each intestinal microbiome

| Order              | Taxonomy                   |                                     | Group       | 0 week        | Δ4 weeks –<br>0 week | Δ8 weeks –<br>0 week |
|--------------------|----------------------------|-------------------------------------|-------------|---------------|----------------------|----------------------|
|                    | Family                     | Genus                               |             |               |                      |                      |
| Bacteroidales      | <i>Bacteroidaceae</i>      | <i>Bacteroides</i>                  | T0 (n = 19) | 6.686 ± 6.481 | -0.57 ± 9.04         | 4.78 ± 11.21         |
|                    |                            |                                     | T3 (n = 14) | 10.31 ± 9.623 | -0.14 ± 7.68         | -1.36 ± 7.03         |
|                    |                            |                                     | T5 (n = 17) | 8.029 ± 8.086 | 1.86 ± 8.60          | 8.01 ± 9.32          |
| Bacteroidales      | <i>Prevotellaceae</i>      | <i>Paraprevotella</i>               | T0 (n = 19) | 0.193 ± 0.732 | -0.16 ± 0.64         | 0.03 ± 0.12          |
|                    |                            |                                     | T3 (n = 14) | 0.081 ± 0.166 | -0.05 ± 0.14         | -0.03 ± 0.13         |
|                    |                            |                                     | T5 (n = 17) | 0.369 ± 0.652 | -0.12 ± 0.37         | -0.17 ± 0.43         |
| Desulfovibrionales | <i>Desulfovibrionaceae</i> | <i>Desulfovibrio</i>                | T0 (n = 19) | 0.046 ± 0.147 | -0.04 ± 0.15         | 0.08 ± 0.27          |
|                    |                            |                                     | T3 (n = 14) | 0.092 ± 0.345 | -0.07 ± 0.25         | -0.06 ± 0.27         |
|                    |                            |                                     | T5 (n = 17) | 0.141 ± 0.294 | 0.07 ± 0.29          | 0.18 ± 0.52          |
| Lachnospirales     | <i>Lachnospiraceae</i>     | <i>Dorea</i>                        | T0 (n = 19) | 2.139 ± 1.881 | 0.65 ± 2.11          | 0.11 ± 2.15          |
|                    |                            |                                     | T3 (n = 14) | 0.802 ± 1.164 | 0.15 ± 0.26          | 0.09 ± 0.70          |
|                    |                            |                                     | T5 (n = 17) | 1.190 ± 1.825 | -0.01 ± 0.85         | -0.37 ± 1.26         |
| Lachnospirales     | <i>Lachnospiraceae</i>     | <i>[Ruminococcus]_torques_group</i> | T0 (n = 19) | 2.454 ± 3.239 | 0.23 ± 1.62          | 0.35 ± 3.04          |
|                    |                            |                                     | T3 (n = 14) | 1.430 ± 1.479 | 0.05 ± 0.84          | 0.70 ± 1.54          |
|                    |                            |                                     | T5 (n = 17) | 1.034 ± 1.618 | -0.50 ± 1.32         | -0.59 ± 1.18         |
| Oscillospirales    | <i>Ruminococcaceae</i>     | <i>Incertae_Sedis</i>               | T0 (n = 19) | 2.269 ± 5.175 | 0.55 ± 5.05          | -0.93 ± 5.50         |
|                    |                            |                                     | T3 (n = 14) | 1.090 ± 0.940 | -0.39 ± 0.74         | 0.92 ± 2.03          |
|                    |                            |                                     | T5 (n = 17) | 1.256 ± 1.586 | -0.29 ± 1.22         | -0.45 ± 1.35         |
| Oscillospirales    | Unclassified               | Unclassified                        | T0 (n = 19) | 0.001 ± 0.002 | 0.00 ± 0.01          | 0.01 ± 0.02          |
|                    |                            |                                     | T3 (n = 14) | 0.002 ± 0.005 | 0.00 ± 0.00          | 0.00 ± 0.00          |
|                    |                            |                                     | T5 (n = 17) | 0.001 ± 0.002 | 0.00 ± 0.00          | 0.00 ± 0.00          |
| Lachnospirales     | <i>Lachnospiraceae</i>     | <i>Sellimonas</i>                   | T0 (n = 19) | 0.137 ± 0.311 | -0.03 ± 0.10         | -0.05 ± 0.09         |
|                    |                            |                                     | T3 (n = 14) | 0.432 ± 0.652 | 0.07 ± 0.71          | 0.19 ± 0.80          |
|                    |                            |                                     | T5 (n = 17) | 0.441 ± 0.784 | -0.24 ± 0.72         | -0.27 ± 0.68         |
| Monoglobales       | <i>Monoglobaceae</i>       | <i>Monoglobus</i>                   | T0 (n = 19) | 1.126 ± 1.037 | 0.09 ± 0.95          | -0.26 ± 1.07         |
|                    |                            |                                     | T3 (n = 14) | 0.761 ± 0.959 | -0.05 ± 0.76         | -0.23 ± 0.72         |
|                    |                            |                                     | T5 (n = 17) | 0.450 ± 0.489 | 0.14 ± 0.66          | -0.04 ± 0.41         |

Data are represented as Mean ± SD. T0, Placebo; T3, PHGG 3 g/day; T5, PHGG 5 g/day.
