# Supplementary material for: Partially hydrolyzed guar gum is associated : with improvement in gut health, sleep, and motivation among healthy subjects
Source: PubMed Central journal article supplement — J Clin Biochem Nutr. 2023 Jan 13;72(2):189–97. doi: 10.3164/jcbn.22-75 (PMC10017317; doi:10.3164/jcbn.22-75), 2023-01-13
Supplement: jcbn22-75_5.pdf [file jcbn22-75_5.pdf]

**Supplemental Table 2.** The fecal moisture and pH

| Category              | Group               | 0 week          | 4 weeks         | 8 weeks                      | $\Delta$ 4 weeks – 0 week | $\Delta$ 8 weeks – 0 week |
|-----------------------|---------------------|-----------------|-----------------|------------------------------|---------------------------|---------------------------|
| Moisture Contents (%) | T0 ( <i>n</i> = 19) | 75.0 $\pm$ 8.19 | 73.7 $\pm$ 7.97 | 73.7 $\pm$ 7.24              | -0.43 $\pm$ 9.28          | -0.40 $\pm$ 8.56          |
|                       | T3 ( <i>n</i> = 12) | 76.9 $\pm$ 7.08 | 78.6 $\pm$ 9.24 | 76.8 $\pm$ 9.84              | 0.54 $\pm$ 8.00           | -0.86 $\pm$ 8.54          |
|                       | T5 ( <i>n</i> = 16) | 75.4 $\pm$ 10.5 | 75.7 $\pm$ 10.4 | 74.5 $\pm$ 10.5              | 0.13 $\pm$ 8.92           | -1.84 $\pm$ 5.57          |
| pH                    | T0 ( <i>n</i> = 19) | 6.99 $\pm$ 0.66 | 7.14 $\pm$ 0.70 | 7.53 $\pm$ 0.44 <sup>#</sup> | 0.15 $\pm$ 0.53           | 0.54 $\pm$ 0.76           |
|                       | T3 ( <i>n</i> = 14) | 6.87 $\pm$ 0.83 | 7.25 $\pm$ 0.96 | 7.07 $\pm$ 0.67*             | 0.39 $\pm$ 0.70           | 0.21 $\pm$ 0.85           |
|                       | T5 ( <i>n</i> = 17) | 6.88 $\pm$ 0.45 | 6.97 $\pm$ 0.61 | 7.21 $\pm$ 0.51              | 0.09 $\pm$ 0.68           | 0.33 $\pm$ 0.66           |

Data are represented as Mean  $\pm$  SD. T0, Placebo; T3, PHGG 3 g/day; T5, PHGG 5 g/day. Between-group comparison with placebo: \* $p$ <0.05. Within-group comparison with baseline: <sup>#</sup> $p$ <0.05.
