# Supplementary material for: Partially hydrolyzed guar gum is associated : with improvement in gut health, sleep, and motivation among healthy subjects
Source: PubMed Central journal article supplement — J Clin Biochem Nutr. 2023 Jan 13;72(2):189–97. doi: 10.3164/jcbn.22-75 (PMC10017317; doi:10.3164/jcbn.22-75), 2023-01-13
Supplement: jcbn22-75_6.pdf [file jcbn22-75_6.pdf]

**Supplemental Table 3.** The changes from the baseline of VAS scores for QOL questionnaire

| Category                         | Group       | 0 week       | Δ4 weeks – 0 week | Δ8 weeks – 0 week |
|----------------------------------|-------------|--------------|-------------------|-------------------|
| Initiation of sleep              | T0 (n = 19) | 5.52 ± 2.14  | -1.49 ± 1.6       | -1.21 ± 1.90      |
|                                  | T3 (n = 14) | 5.81 ± 2.32  | -1.71 ± 1.81      | -1.49 ± 1.89      |
|                                  | T5 (n = 17) | 6.36 ± 2.14  | -2.09 ± 2.08      | -1.27 ± 1.99      |
| Feeling of sufficient sleep      | T0 (n = 19) | 4.77 ± 2.49  | -1.11 ± 2.14      | -0.87 ± 2.04      |
|                                  | T3 (n = 14) | 4.62 ± 2.71  | -0.67 ± 2.24      | -0.58 ± 2.68      |
|                                  | T5 (n = 17) | 4.49 ± 2.54  | -0.95 ± 2.3       | -0.05 ± 3.01      |
| Refreshment on waking up         | T0 (n = 19) | 4.51 ± 2.38  | -0.77 ± 1.95      | -0.74 ± 1.87      |
|                                  | T3 (n = 14) | 5.30 ± 2.37  | -1.59 ± 1.66      | -1.29 ± 1.96      |
|                                  | T5 (n = 17) | 4.95 ± 2.71  | -0.40 ± 2.16      | -0.19 ± 2.76      |
| Fatigue on waking up             | T0 (n = 19) | 3.86 ± 2.22  | -0.86 ± 1.84      | -0.46 ± 2.05      |
|                                  | T3 (n = 14) | 4.60 ± 2.03  | -1.19 ± 1.49      | -1.10 ± 1.78      |
|                                  | T5 (n = 17) | 4.36 ± 2.55  | -0.49 ± 2.14      | 0.18 ± 2.48       |
| Daytime sleepiness               | T0 (n = 19) | 4.66 ± 2.39  | -0.66 ± 1.97      | -0.74 ± 1.88      |
|                                  | T3 (n = 14) | 4.74 ± 2.26  | -0.61 ± 1.72      | -0.40 ± 2.15      |
|                                  | T5 (n = 17) | 4.42 ± 2.34  | -1.55 ± 2.44      | -1.03 ± 2.37      |
| Stress related activities        | T0 (n = 19) | 3.83 ± 1.85  | -1.12 ± 1.14      | -0.71 ± 1.27      |
|                                  | T3 (n = 14) | 3.55 ± 1.91  | -0.32 ± 1.52      | -0.11 ± 1.16      |
|                                  | T5 (n = 17) | 4.45 ± 2.18  | -0.89 ± 1.98      | -0.51 ± 1.72      |
| Motivation toward work and study | T0 (n = 19) | 4.88 ± 2.51  | -1.29 ± 2.45      | -1.28 ± 1.67      |
|                                  | T3 (n = 14) | 5.04 ± 1.72  | -1.13 ± 1.64      | -1.26 ± 1.31      |
|                                  | T5 (n = 17) | 5.64 ± 1.88  | -1.32 ± 1.18      | -1.17 ± 1.61      |
| Physical fatigue                 | T0 (n = 19) | 3.59 ± 2.10  | -0.39 ± 1.73      | -0.05 ± 1.58      |
|                                  | T3 (n = 14) | 4.31 ± 1.79  | -0.81 ± 1.60      | -1.05 ± 1.55      |
|                                  | T5 (n = 17) | 5.02 ± 1.62* | -0.97 ± 2.23      | -0.56 ± 1.87      |
| Mental fatigue                   | T0 (n = 19) | 3.77 ± 2.38  | -0.75 ± 2.10      | -0.53 ± 1.92      |
|                                  | T3 (n = 14) | 4.51 ± 2.25  | -0.91 ± 1.52      | -1.14 ± 1.49      |
|                                  | T5 (n = 17) | 5.49 ± 2.31  | -1.61 ± 1.84      | -1.24 ± 1.86      |

Data are represented as Mean ± SD. T0, Placebo; T3, PHGG 3 g/day; T5, PHGG 5 g/day. Between-group comparison with placebo: \* $p < 0.05$ .
